# Supplementary material for: Genetic Screening of a Large Panel of Genes Associated with Cardiac Disease in a Spanish Heart Transplanted Cohort
Source: MDPI journal article supplement (doi:10.3390/cardiogenetics12020018), 2022-05-09
Supplement: s1 [file s1]

**Supplementary Table S1.** Genes included in the NGS

| Gene            | Chr   | Num. Amplicons | Total Bases | Covered Bases | Missed Bases | Overall Coverage |
|-----------------|-------|----------------|-------------|---------------|--------------|------------------|
| <i>ABCC8</i>    | chr11 | 47             | 5139        | 5139          | 0            | 1                |
| <i>ABCC9</i>    | chr12 | 44             | 5178        | 5178          | 0            | 1                |
| <i>ACTA2</i>    | chr10 | 8              | 1214        | 1214          | 0            | 1                |
| <i>ACTC1</i>    | chr15 | 8              | 1194        | 1194          | 0            | 1                |
| <i>ACTN2</i>    | chr1  | 28             | 3112        | 3112          | 0            | 1                |
| <i>ACVRL1</i>   | chr12 | 14             | 1602        | 1602          | 0            | 1                |
| <i>ADAMTSL4</i> | chr1  | 31             | 4269        | 4269          | 0            | 1                |
| <i>AGL</i>      | chr1  | 52             | 6024        | 6024          | 0            | 1                |
| <i>AKAP9</i>    | chr7  | 90             | 12224       | 12224         | 0            | 1                |
| <i>ALMS1</i>    | chr2  | 85             | 12734       | 12734         | 0            | 1                |
| <i>ANK2</i>     | chr4  | 93             | 12411       | 12411         | 0            | 1                |
| <i>ANKRD1</i>   | chr10 | 9              | 1050        | 1050          | 0            | 1                |
| <i>APOB</i>     | chr2  | 85             | 13982       | 13982         | 0            | 1                |
| <i>ATP7A</i>    | chrX  | 41             | 4723        | 4723          | 0            | 1                |
| <i>B3GAT3</i>   | chr11 | 13             | 1474        | 1471          | 3            | .998             |
| <i>BAG3</i>     | chr10 | 12             | 1768        | 1768          | 0            | 1                |
| <i>BGN</i>      | chrX  | 12             | 1457        | 1457          | 0            | 1                |
| <i>BLK</i>      | chr8  | 21             | 2118        | 2118          | 0            | 1                |
| <i>BMP10</i>    | chr2  | 9              | 1375        | 1375          | 0            | 1                |
| <i>BMPR1A</i>   | chr10 | 13             | 1709        | 1709          | 0            | 1                |
| <i>BMPR1B</i>   | chr4  | 13             | 1709        | 1709          | 0            | 1                |
| <i>BMPR2</i>    | chr2  | 25             | 3247        | 3247          | 0            | 1                |
| <i>BRAF</i>     | chr7  | 23             | 2481        | 2481          | 0            | 1                |
| <i>CACNA1C</i>  | chr12 | 64             | 7626        | 7626          | 0            | 1                |
| <i>CACNA1D</i>  | chr3  | 64             | 7150        | 7150          | 0            | 1                |
| <i>CACNA2D1</i> | chr7  | 51             | 5327        | 5327          | 0            | 1                |
| <i>CACNB2</i>   | chr10 | 26             | 3269        | 3269          | 0            | 1                |
| <i>CALM1</i>    | chr14 | 7              | 690         | 690           | 0            | 1                |
| <i>CALM2</i>    | chr2  | 7              | 664         | 664           | 0            | 1                |
| <i>CALM3</i>    | chr19 | 8              | 750         | 750           | 0            | 1                |
| <i>CALR3</i>    | chr19 | 14             | 1605        | 1574          | 31           | .9807            |
| <i>CASQ2</i>    | chr1  | 13             | 1750        | 1750          | 0            | 1                |
| <i>CAV3</i>     | chr3  | 4              | 476         | 476           | 0            | 1                |
| <i>CBL</i>      | chr11 | 23             | 2881        | 2881          | 0            | 1                |
| <i>CBS</i>      | chr21 | 21             | 1806        | 1806          | 0            | 1                |
| <i>CHRM2</i>    | chr7  | 8              | 1451        | 1451          | 0            | 1                |
| <i>COL1A1</i>   | chr17 | 56             | 4905        | 4905          | 0            | 1                |
| <i>COL1A2</i>   | chr7  | 55             | 4621        | 4621          | 0            | 1                |
| <i>COL3A1</i>   | chr2  | 57             | 4911        | 4911          | 0            | 1                |
| <i>COL5A1</i>   | chr9  | 78             | 6256        | 6256          | 0            | 1                |
| <i>COL5A2</i>   | chr2  | 64             | 7200        | 7200          | 0            | 1                |
| <i>CRYAB</i>    | chr11 | 5              | 678         | 678           | 0            | 1                |
| <i>CSRP3</i>    | chr11 | 6              | 635         | 635           | 0            | 1                |

|                |       |     |       |       |    |       |
|----------------|-------|-----|-------|-------|----|-------|
| <i>CTNNA3</i>  | chr10 | 29  | 3758  | 3758  | 0  | 1     |
| <i>CTNNB1</i>  | chr3  | 19  | 2486  | 2486  | 0  | 1     |
| <i>DES</i>     | chr2  | 15  | 1503  | 1503  | 0  | 1     |
| <i>DMD</i>     | chrX  | 106 | 12161 | 12161 | 0  | 1     |
| <i>DNAJC19</i> | chr3  | 6   | 411   | 411   | 0  | 1     |
| <i>DOLK</i>    | chr9  | 9   | 1667  | 1667  | 0  | 1     |
| <i>DSC2</i>    | chr18 | 25  | 2912  | 2912  | 0  | 1     |
| <i>DSG2</i>    | chr18 | 28  | 3507  | 3507  | 0  | 1     |
| <i>DSP</i>     | chr6  | 57  | 8856  | 8856  | 0  | 1     |
| <i>DTNA</i>    | chr18 | 29  | 3795  | 3795  | 0  | 1     |
| <i>EIF2AK3</i> | chr2  | 32  | 4201  | 4201  | 0  | 1     |
| <i>EIF2AK4</i> | chr15 | 51  | 6900  | 6900  | 0  | 1     |
| <i>ELN</i>     | chr7  | 37  | 4094  | 4094  | 0  | 1     |
| <i>EMD</i>     | chrX  | 9   | 1005  | 1005  | 0  | 1     |
| <i>ENG</i>     | chr9  | 22  | 2753  | 2753  | 0  | 1     |
| <i>EYA4</i>    | chr6  | 26  | 3039  | 3039  | 0  | 1     |
| <i>FBN1</i>    | chr15 | 73  | 9266  | 9266  | 0  | 1     |
| <i>FBN2</i>    | chr5  | 88  | 9389  | 9389  | 0  | 1     |
| <i>FHL1</i>    | chrX  | 11  | 1472  | 1466  | 6  | .9959 |
| <i>FHL2</i>    | chr2  | 9   | 1090  | 1090  | 0  | 1     |
| <i>FKRP</i>    | chr19 | 11  | 1498  | 1498  | 0  | 1     |
| <i>FKTN</i>    | chr9  | 13  | 1509  | 1509  | 0  | 1     |
| <i>FLNA</i>    | chrX  | 76  | 10294 | 10294 | 0  | 1     |
| <i>FLNC</i>    | chr7  | 75  | 8658  | 8658  | 0  | 1     |
| <i>GAA</i>     | chr17 | 27  | 3049  | 3049  | 0  | 1     |
| <i>GATA4</i>   | chr8  | 12  | 1392  | 1392  | 0  | 1     |
| <i>GATA5</i>   | chr20 | 12  | 1494  | 1494  | 0  | 1     |
| <i>GATAD1</i>  | chr7  | 9   | 1060  | 1060  | 0  | 1     |
| <i>GCK</i>     | chr7  | 17  | 1608  | 1608  | 0  | 1     |
| <i>GDF2</i>    | chr10 | 7   | 1390  | 1390  | 0  | 1     |
| <i>GJA1</i>    | chr6  | 6   | 1159  | 1159  | 0  | 1     |
| <i>GJA5</i>    | chr1  | 8   | 1117  | 1117  | 0  | 1     |
| <i>GLA</i>     | chrX  | 10  | 1360  | 1360  | 0  | 1     |
| <i>GLIS3</i>   | chr9  | 22  | 3293  | 3293  | 0  | 1     |
| <i>GPD1L</i>   | chr3  | 11  | 1376  | 1376  | 0  | 1     |
| <i>HFE</i>     | chr6  | 9   | 1125  | 1107  | 18 | .984  |
| <i>HNFB1A</i>  | chr12 | 16  | 2017  | 2017  | 0  | 1     |
| <i>HNFB1B</i>  | chr17 | 16  | 1856  | 1856  | 0  | 1     |
| <i>HNFB4A</i>  | chr20 | 20  | 1860  | 1860  | 0  | 1     |
| <i>HRAS</i>    | chr11 | 5   | 683   | 683   | 0  | 1     |
| <i>ILK</i>     | chr11 | 14  | 1959  | 1959  | 0  | 1     |
| <i>JPH2</i>    | chr20 | 17  | 2402  | 2402  | 0  | 1     |
| <i>JUP</i>     | chr17 | 21  | 2368  | 2368  | 0  | 1     |
| <i>KCNA5</i>   | chr12 | 11  | 1892  | 1892  | 0  | 1     |
| <i>KCND2</i>   | chr7  | 15  | 2193  | 2193  | 0  | 1     |

|                |       |    |      |      |   |       |
|----------------|-------|----|------|------|---|-------|
| <i>KCND3</i>   | chr1  | 17 | 2318 | 2318 | 0 | 1     |
| <i>KCNE1</i>   | chr21 | 2  | 400  | 400  | 0 | 1     |
| <i>KCNE2</i>   | chr21 | 2  | 382  | 382  | 0 | 1     |
| <i>KCNE3</i>   | chr11 | 2  | 362  | 362  | 0 | 1     |
| <i>KCNE5</i>   | chrX  | 3  | 479  | 479  | 0 | 1     |
| <i>KCNH2</i>   | chr7  | 28 | 4017 | 4017 | 0 | 1     |
| <i>KCNJ11</i>  | chr11 | 6  | 1183 | 1183 | 0 | 1     |
| <i>KCNJ2</i>   | chr17 | 8  | 1294 | 1294 | 0 | 1     |
| <i>KCNJ5</i>   | chr11 | 9  | 1340 | 1340 | 0 | 1     |
| <i>KCNJ8</i>   | chr12 | 8  | 1375 | 1375 | 0 | 1     |
| <i>KCNK3</i>   | chr2  | 9  | 1285 | 1285 | 0 | 1     |
| <i>KCNQ1</i>   | chr11 | 20 | 2206 | 2206 | 0 | 1     |
| <i>KLF11</i>   | chr2  | 11 | 1739 | 1739 | 0 | 1     |
| <i>KRAS</i>    | chr12 | 6  | 737  | 737  | 0 | 1     |
| <i>LAMA4</i>   | chr6  | 55 | 7540 | 7540 | 0 | 1     |
| <i>LAMP2</i>   | chrX  | 15 | 1626 | 1626 | 0 | 1     |
| <i>LDB3</i>    | chr10 | 24 | 2668 | 2664 | 4 | .9985 |
| <i>LDLR</i>    | chr19 | 21 | 2763 | 2763 | 0 | 1     |
| <i>LDLRAP1</i> | chr1  | 14 | 1377 | 1377 | 0 | 1     |
| <i>LIPA</i>    | chr10 | 14 | 1650 | 1650 | 0 | 1     |
| <i>LMNA</i>    | chr1  | 18 | 2369 | 2369 | 0 | 1     |
| <i>LOX</i>     | chr5  | 13 | 1604 | 1604 | 0 | 1     |
| <i>LZTR1</i>   | chr22 | 29 | 2733 | 2733 | 0 | 1     |
| <i>MAP2K1</i>  | chr15 | 12 | 1292 | 1292 | 0 | 1     |
| <i>MAP2K2</i>  | chr19 | 13 | 1313 | 1313 | 0 | 1     |
| <i>MAT2A</i>   | chr2  | 11 | 1638 | 1638 | 0 | 1     |
| <i>MED12</i>   | chrX  | 59 | 6984 | 6984 | 0 | 1     |
| <i>MFAP5</i>   | chr12 | 9  | 972  | 972  | 0 | 1     |
| <i>MIB1</i>    | chr18 | 36 | 4071 | 4071 | 0 | 1     |
| <i>MURC</i>    | chr9  | 7  | 1195 | 1195 | 0 | 1     |
| <i>MYBPC3</i>  | chr11 | 35 | 4155 | 4155 | 0 | 1     |
| <i>MYH11</i>   | chr16 | 51 | 6391 | 6391 | 0 | 1     |
| <i>MYH6</i>    | chr14 | 51 | 6190 | 6190 | 0 | 1     |
| <i>MYH7</i>    | chr14 | 45 | 6188 | 6188 | 0 | 1     |
| <i>MYL2</i>    | chr12 | 7  | 571  | 571  | 0 | 1     |
| <i>MYL3</i>    | chr3  | 6  | 648  | 648  | 0 | 1     |
| <i>MYLK</i>    | chr3  | 41 | 6055 | 6055 | 0 | 1     |
| <i>MYLK2</i>   | chr20 | 21 | 2391 | 2391 | 0 | 1     |
| <i>MYOM1</i>   | chr18 | 56 | 6908 | 6908 | 0 | 1     |
| <i>MYOZ2</i>   | chr4  | 8  | 1045 | 1045 | 0 | 1     |
| <i>MYPN</i>    | chr10 | 36 | 4983 | 4983 | 0 | 1     |
| <i>NEBL</i>    | chr10 | 38 | 5002 | 5002 | 0 | 1     |
| <i>NEUROD1</i> | chr2  | 6  | 1121 | 1121 | 0 | 1     |
| <i>NEUROG3</i> | chr10 | 5  | 695  | 695  | 0 | 1     |
| <i>NEXN</i>    | chr1  | 21 | 2628 | 2628 | 0 | 1     |

|                |       |     |       |       |    |       |
|----------------|-------|-----|-------|-------|----|-------|
| <i>NF1</i>     | chr17 | 74  | 9161  | 9161  | 0  | 1     |
| <i>NKX2-5</i>  | chr5  | 9   | 1142  | 1142  | 0  | 1     |
| <i>NKX2-6</i>  | chr8  | 6   | 926   | 926   | 0  | 1     |
| <i>NNT</i>     | chr5  | 37  | 4311  | 4306  | 5  | .9988 |
| <i>NOTCH1</i>  | chr9  | 63  | 8008  | 7987  | 21 | .9974 |
| <i>NOTCH3</i>  | chr19 | 51  | 7296  | 7296  | 0  | 1     |
| <i>NPPA</i>    | chr1  | 4   | 486   | 486   | 0  | 1     |
| <i>NRAS</i>    | chr1  | 5   | 610   | 610   | 0  | 1     |
| <i>PAX6</i>    | chr11 | 13  | 2035  | 2035  | 0  | 1     |
| <i>PCSK9</i>   | chr1  | 16  | 2199  | 2199  | 0  | 1     |
| <i>PDLIM3</i>  | chr4  | 13  | 1733  | 1733  | 0  | 1     |
| <i>PDX1</i>    | chr13 | 7   | 952   | 952   | 0  | 1     |
| <i>PITX2</i>   | chr4  | 11  | 1209  | 1209  | 0  | 1     |
| <i>PKP2</i>    | chr12 | 21  | 2786  | 2786  | 0  | 1     |
| <i>PLN</i>     | chr6  | 1   | 169   | 169   | 0  | 1     |
| <i>PLOD1</i>   | chr1  | 28  | 3325  | 3325  | 0  | 1     |
| <i>PPARG</i>   | chr3  | 12  | 1588  | 1588  | 0  | 1     |
| <i>PRDM16</i>  | chr1  | 37  | 4681  | 4654  | 27 | .9942 |
| <i>PRKAG2</i>  | chr7  | 19  | 1974  | 1974  | 0  | 1     |
| <i>PRKG1</i>   | chr10 | 26  | 3087  | 3087  | 0  | 1     |
| <i>PSEN1</i>   | chr14 | 12  | 1504  | 1504  | 0  | 1     |
| <i>PSEN2</i>   | chr1  | 15  | 1447  | 1447  | 0  | 1     |
| <i>PTPN11</i>  | chr12 | 16  | 1936  | 1936  | 0  | 1     |
| <i>RAF1</i>    | chr3  | 18  | 2107  | 2107  | 0  | 1     |
| <i>RANGRF</i>  | chr17 | 8   | 853   | 853   | 0  | 1     |
| <i>RASA1</i>   | chr5  | 39  | 3412  | 3411  | 1  | .9997 |
| <i>RASA2</i>   | chr3  | 38  | 3815  | 3793  | 22 | .9942 |
| <i>RBM20</i>   | chr10 | 27  | 3824  | 3817  | 7  | .9982 |
| <i>RFX6</i>    | chr6  | 30  | 3737  | 3737  | 0  | 1     |
| <i>RIT1</i>    | chr1  | 8   | 771   | 771   | 0  | 1     |
| <i>RYR2</i>    | chr1  | 134 | 15954 | 15954 | 0  | 1     |
| <i>SCN10A</i>  | chr3  | 49  | 7221  | 7221  | 0  | 1     |
| <i>SCN1B</i>   | chr19 | 9   | 1066  | 1066  | 0  | 1     |
| <i>SCN2B</i>   | chr11 | 7   | 848   | 848   | 0  | 1     |
| <i>SCN3B</i>   | chr11 | 8   | 898   | 898   | 0  | 1     |
| <i>SCN4B</i>   | chr11 | 7   | 887   | 887   | 0  | 1     |
| <i>SCN5A</i>   | chr3  | 44  | 6423  | 6423  | 0  | 1     |
| <i>SDHA</i>    | chr5  | 19  | 2145  | 2145  | 0  | 1     |
| <i>SGCD</i>    | chr5  | 8   | 1025  | 1025  | 0  | 1     |
| <i>SHOC2</i>   | chr10 | 14  | 1829  | 1829  | 0  | 1     |
| <i>SLC19A2</i> | chr1  | 13  | 1794  | 1794  | 0  | 1     |
| <i>SLC22A5</i> | chr5  | 14  | 1856  | 1856  | 0  | 1     |
| <i>SLC2A10</i> | chr20 | 14  | 1876  | 1876  | 0  | 1     |
| <i>SLMAP</i>   | chr3  | 33  | 3799  | 3799  | 0  | 1     |
| <i>SMAD1</i>   | chr4  | 12  | 1698  | 1698  | 0  | 1     |

|               |       |     |        |        |      |       |
|---------------|-------|-----|--------|--------|------|-------|
| <i>SMAD2</i>  | chr18 | 13  | 1504   | 1504   | 0    | 1     |
| <i>SMAD3</i>  | chr15 | 14  | 1452   | 1452   | 0    | 1     |
| <i>SMAD4</i>  | chr18 | 18  | 1769   | 1769   | 0    | 1     |
| <i>SMAD9</i>  | chr13 | 13  | 1704   | 1704   | 0    | 1     |
| <i>SNTA1</i>  | chr20 | 17  | 1918   | 1918   | 0    | 1     |
| <i>SOS1</i>   | chr2  | 40  | 4232   | 4232   | 0    | 1     |
| <i>SOS2</i>   | chr14 | 46  | 4919   | 4919   | 0    | 1     |
| <i>SPRED1</i> | chr15 | 13  | 1405   | 1405   | 0    | 1     |
| <i>STAP1</i>  | chr4  | 10  | 1248   | 1248   | 0    | 1     |
| <i>TAZ</i>    | chrX  | 14  | 1043   | 1043   | 0    | 1     |
| <i>TBX5</i>   | chr12 | 12  | 1637   | 1637   | 0    | 1     |
| <i>TCAP</i>   | chr17 | 5   | 524    | 524    | 0    | 1     |
| <i>TGFB2</i>  | chr1  | 12  | 1409   | 1409   | 0    | 1     |
| <i>TGFB3</i>  | chr14 | 10  | 1589   | 1589   | 0    | 1     |
| <i>TGFBR1</i> | chr9  | 13  | 1614   | 1614   | 0    | 1     |
| <i>TGFBR2</i> | chr3  | 12  | 1859   | 1859   | 0    | 1     |
| <i>TMEM43</i> | chr3  | 13  | 1323   | 1323   | 0    | 1     |
| <i>TMPO</i>   | chr12 | 25  | 3385   | 3385   | 0    | 1     |
| <i>TNNC1</i>  | chr3  | 7   | 546    | 546    | 0    | 1     |
| <i>TNNI3</i>  | chr19 | 7   | 702    | 702    | 0    | 1     |
| <i>TNNI3K</i> | chr1  | 30  | 3758   | 3710   | 48   | .9872 |
| <i>TNNT2</i>  | chr1  | 17  | 1081   | 1081   | 0    | 1     |
| <i>TOPBP1</i> | chr3  | 51  | 5919   | 5919   | 0    | 1     |
| <i>TPM1</i>   | chr15 | 15  | 1500   | 1500   | 0    | 1     |
| <i>TRDN</i>   | chr6  | 48  | 4418   | 4418   | 0    | 1     |
| <i>TRPM4</i>  | chr19 | 32  | 3895   | 3895   | 0    | 1     |
| <i>TTN</i>    | chr2  | 800 | 132581 | 129775 | 2806 | .9788 |
| <i>TTR</i>    | chr18 | 5   | 484    | 484    | 0    | 1     |
| <i>TXNRD2</i> | chr22 | 23  | 2543   | 2543   | 0    | 1     |
| <i>VCL</i>    | chr10 | 36  | 4505   | 4505   | 0    | 1     |
| <i>WFS1</i>   | chr4  | 19  | 2743   | 2743   | 0    | 1     |
| <i>ZDHHC9</i> | chrX  | 10  | 1545   | 1545   | 0    | 1     |

**Supplementary. Table S2.** Transcripts for the genes with candidate variants.

| <b>GENE</b>   | <b>Transcript ID</b> | <b>RefSeq Match</b> |
|---------------|----------------------|---------------------|
| <i>AKAP9</i>  | ENST00000356239      | NM_005751           |
| <i>ANK2</i>   | ENST00000357077      | NM_001148           |
| <i>APOB</i>   | ENST00000233242      | NM_000384           |
| <i>BAG3</i>   | ENST00000369085      | NM_004281           |
| <i>BMPR2</i>  | ENST00000374580      | NM_001204           |
| <i>DMD</i>    | ENST00000357033      | NM_004006           |
| <i>DSP</i>    | ENST00000379802      | NM_004415           |
| <i>ELN</i>    | ENST00000252034      | NM_000501           |
| <i>EMD</i>    | ENST00000369842      | NM_000117           |
| <i>FBN1</i>   | ENST00000316623      | NM_000138           |
| <i>FKRP</i>   | ENST00000391909      | NM_001039885        |
| <i>FLNC</i>   | ENST00000325888      | NM_001458           |
| <i>GAA</i>    | ENST00000390015      | NM_001079804        |
| <i>GDF2</i>   | ENST00000581492      | NM_016204           |
| <i>GLA</i>    | ENST00000218516      | NM_000169           |
| <i>JPH2</i>   | ENST00000372980      | NM_020433           |
| <i>JUP</i>    | ENST00000393931      | NM_002230           |
| <i>KCNH2</i>  | ENST00000262186      | NM_000238           |
| <i>LAMA4</i>  | ENST00000230538      | NM_001105206        |
| <i>LDB3</i>   | ENST00000361373      | NM_007078           |
| <i>LDLR</i>   | ENST00000558518      | NM_000527           |
| <i>LMNA</i>   | ENST00000368300      | NM_170707           |
| <i>MIB1</i>   | ENST00000261537      | NM_020774           |
| <i>MYBPC3</i> | ENST00000545968      | NM_000256           |
| <i>MYH6</i>   | ENST00000405093      | NM_002471           |
| <i>MYH7</i>   | ENST00000355349      | NM_000257           |
| <i>MYH11</i>  | ENST00000396324      | NM_001040114        |
| <i>MYLK</i>   | ENST00000360304      | NM_053025           |
| <i>MYPN</i>   | ENST00000540630      | NM_001256267        |
| <i>NEBL</i>   | ENST00000377122      | NM_006393           |
| <i>NOTCH1</i> | ENST00000651671      | NM_017617           |
| <i>PDX1</i>   | ENST00000381033      | NM_000209           |
| <i>PKP2</i>   | ENST00000070846      | NM_004572           |
| <i>RBM20</i>  | ENST00000369519      | NM_001134363        |
| <i>RIT1</i>   | ENST00000368322      | NM_001256821        |
| <i>RYR2</i>   | ENST00000366574      | NM_001035           |
| <i>SCN5A</i>  | ENST00000413689      | NM_001160161        |
| <i>SMAD9</i>  | ENST00000379826      | NM_001127217        |
| <i>TCAP</i>   | ENST00000309889      | NM_003673           |
| <i>TMEM43</i> | ENST00000306077      | NM_024334           |
| <i>TNNI3</i>  | ENST00000344887      | NM_000363           |
| <i>TNNT2</i>  | ENST00000236918      | NM_001276345        |
| <i>TRPM4</i>  | ENST00000252826      | NM_017636           |
| <i>TTN</i>    | ENST00000460472      | NM_003319           |

**Supplementary Table S3.** Main clinical characteristics of the ischemic cases.

|                                          |                    | Ischemic Patients<br>(N=63) |
|------------------------------------------|--------------------|-----------------------------|
| <b>Deceased n(%)</b>                     |                    | 37 (58.7)                   |
| <b>Smokers pre-HT n(%)</b>               |                    | 51 (80.9)                   |
| <b>Arterial hypertension pre-HT n(%)</b> |                    | 39 (61.9)                   |
| <b>Mellitus Diabetes (%)</b>             | No                 | 61.9                        |
|                                          | Type 1             | 27.0                        |
|                                          | Type 2             | 11.1                        |
| <b>Dyslipidemia n(%)</b>                 |                    | 30 (47.6)                   |
| <b>Renal Disease n(%)</b>                |                    | 3 (4.8)                     |
| <b>Family history of severe HF n(%)</b>  |                    | 10 (15.8)                   |
| <b>Myocardial infarction n(%)</b>        |                    | 50 (79.4)                   |
| <b>LVEF (%)</b>                          | >53                | 6.4                         |
|                                          | 45-53              | 1.6                         |
|                                          | 35-45              | 9.5                         |
|                                          | <35                | 82.5                        |
| <b>Coronary heart disease (%)</b>        | No                 | —                           |
|                                          | LMCA               | 10.3                        |
|                                          | A blood vessel     | 22.4                        |
|                                          | Two blood vessel   | 25.9                        |
|                                          | Three blood vessel | 41.4                        |
| <b>Revascularization (%)</b>             | No                 | 49.2                        |
|                                          | Complete           | 23.8                        |
|                                          | Incomplete         | 27.0                        |
| <b>Fibrinolysis n(%)</b>                 |                    | 20 (31.7)                   |
| <b>PCI n(%)</b>                          |                    | 22 (34.9)                   |
| <b>CABG n(%)</b>                         |                    | 11 (17.5)                   |

HT: heart transplantation; HF: heart failure; LMCA: left main coronary artery; LVEF: left ventricular ejection fraction; PCI: percutaneous coronary intervention; CABG: coronary artery bypass graft.

**Supplementary Table S4.** Family studies in available patients.

| Patient ID | Variant           | Age | Sex    | Genetic status | Clinical status                 |
|------------|-------------------|-----|--------|----------------|---------------------------------|
| 2          | LMNA p.R190W      | 38  | Male   | Carrier        | DCM non-ischemic (Transplanted) |
| 2.2        |                   | 13  | Female | Non carrier    | Normal                          |
| 2.3        |                   | 8   | Male   | Non carrier    | Normal                          |
| 2.4        |                   | 57  | Female | Non carrier    | Normal                          |
| 2.5        |                   | 75  | Female | Non carrier    | Normal                          |
| 3          | LMNA p.R190W      | 67  | Female | Carrier        | DCM non-ischemic (Transplanted) |
| 3.2        |                   | 71  | Female | Non carrier    | Normal                          |
| 3.3        |                   | 61  | Female | Non carrier    | Normal                          |
| 3.4        |                   | 45  | Male   | Carrier        | DCM non-ischemic                |
| 3.5        |                   | 4   | Female | Carrier        | Normal                          |
| 3.7        |                   | 36  | Male   | Carrier        | DCM non-ischemic                |
| 3.8        |                   | 14  | Male   | Carrier        | Normal                          |
| 5          | MYBC3 c.2308+1G>A | 76  | Male   | Carrier        | HCM (Transplanted)              |
| 5.2        |                   | 40  | Male   | Carrier        | HCM                             |
| 5.3        |                   | 46  | Male   | Carrier        | HCM                             |
| 5.4        |                   | 8   | Female | Non carrier    | Normal                          |
| 5.5        |                   | 8   | Male   | Non carrier    | Normal                          |
| 5.6        |                   | 65  | Female | Non carrier    | Normal                          |
| 5.7        |                   | 69  | Female | Non carrier    | Normal                          |
| 5.8        |                   | 51  | Male   | Non carrier    | Normal                          |
| 5.9        |                   | 48  | Female | Carrier        | Normal                          |
| 5.10       |                   | 27  | Female | Non carrier    | Normal                          |
| 5.11       |                   | 18  | Male   | Carrier        | HCM                             |
| 7          | MYH7 p.R663C      | 63  | Male   | Carrier        | HCM (Transplanted)              |
| 7.2        |                   | 39  | Male   | Carrier        | HCM                             |
| 8          | MYH7 p.R403Q      | 53  | Female | Carrier        | HCM (Transplanted)              |
| 8.2        |                   | 25  | Female | Non carrier    | Normal                          |
| 8.3        |                   | 22  | Male   | Carrier        | HCM                             |
| 10         | TNNT2 p.E173del   | 70  | Female | Carrier        | HCM (Transplanted)              |
| 10.2       |                   | 51  | Female | Carrier        | HCM                             |
| 10.3       |                   | 66  | Female | Carrier        | HCM                             |
| 10.4       |                   | 45  | Female | Non carrier    | Normal                          |
| 10.5       |                   | 68  | Female | Non carrier    | Normal                          |
| 10.6       |                   | 50  | Male   | Non carrier    | Normal                          |
| 13         | TTN c.29453-1G>A  | 76  | Male   | Carrier        | DCM non-ischemic (Transplanted) |
| 13.2       |                   | 72  | Female | Carrier        | Normal                          |
| 13.3       |                   | 74  | Female | Non carrier    | Normal                          |
| 13.5       |                   | 50  | Female | Carrier        | Normal                          |
| 13.6       |                   | 51  | Female | Carrier        | Normal                          |
| 13.7       |                   | 30  | Male   | Carrier        | Normal                          |
| 13.8       |                   | 21  | Male   | Carrier        | Normal                          |



|       |  |    |        |             |        |
|-------|--|----|--------|-------------|--------|
| 13.9  |  | 37 | Male   | Non carrier | Normal |
| 13.10 |  | 13 | Female | Carrier     | Normal |
